# Supplementary material
Source: PubMed Central journal article supplement (PMC4323951)
Supplement: NIHMS656906-supplement-5.pdf [file NIHMS656906-supplement-5.pdf]

**Title**

CUSTOM-FIT RADIOLUCENT CRANIAL IMPLANTS FOR NEUROPHYSIOLOGICAL RECORDING AND STIMULATION

**Authors**

Grant H Mulliken<sup>1\*</sup>, Narcisse P Bichot<sup>1\*</sup>, Azriel Ghadooshahy<sup>1</sup>, Jitendra Sharma<sup>1</sup>, Simon Kornblith<sup>2</sup>, Michael Philcock<sup>3</sup>, & Robert Desimone<sup>1</sup>

1. McGovern Institute for Brain Research at MIT, Cambridge, MA 02139
2. Picower Center for Learning and Memory at MIT, Cambridge, MA 02139
3. AnalyzeDirect, Inc., Overland Park, KS 66085

\*These authors contributed equally to this work

Corresponding author:

Grant H Mulliken

77 Massachusetts Avenue, 46-6165

Cambridge, MA 02139

[grantm@mit.edu](mailto:grantm@mit.edu)

(617) 324-5530
